# Supplementary material
Source: HighWire-hosted journal article supplement (https://bmjopenrespres.bmj.com/content/10/1/e001617)
Supplement: inline-supplementary-material-1 [file inline-supplementary-material-1.pdf]

Content

Text S1. Contact recording form (in Chinese) ..... 2

Text S2. Contact recording form (translated version, in English)..... 4

Table S1. List of touch surfaces for environmental sample collection..... 6

Text S1. Contact recording form (in Chinese)

A.幼儿园接触模式调查表（活动）

|      |                 |                                                                                                         |               |                                                                                                                                                                                                                   |
|------|-----------------|---------------------------------------------------------------------------------------------------------|---------------|-------------------------------------------------------------------------------------------------------------------------------------------------------------------------------------------------------------------|
| 基本情况 | 问卷编号            |                                                                                                         | 观察员           |                                                                                                                                                                                                                   |
|      | 观察日期            |                                                                                                         | 负责班级          |                                                                                                                                                                                                                   |
|      | 观察对象姓名<br>(或学号) |                                                                                                         | 出生日期<br>(或年龄) |                                                                                                                                                                                                                   |
|      | 观察对象性别          |                                                                                                         | 所在教室          |                                                                                                                                                                                                                   |
|      | 当日班级学生数         |                                                                                                         | 负责老师          |                                                                                                                                                                                                                   |
| 呼吸道  | 当日呼吸道症状         | <input type="checkbox"/> 流鼻涕 <input type="checkbox"/> 打喷嚏 <input type="checkbox"/> 咳嗽(可多选)    补充: _____ |               |                                                                                                                                                                                                                   |
| 活动   | 场地位置            | <input type="checkbox"/> 教室 <input type="checkbox"/> 走廊 <input type="checkbox"/> 操场<br>补充: _____        | 场地情况          | <input type="checkbox"/> 课间 <input type="checkbox"/> 固定授课 <input type="checkbox"/> 室内活动<br><input type="checkbox"/> 室外活动 <input type="checkbox"/> 室内就餐                                                            |
|      | 开始至结束时间         | _____至_____                                                                                             | 场地人数          | 人数: _____<br><input type="checkbox"/> 1-5 人 <input type="checkbox"/> 6-10 人 <input type="checkbox"/> 11-15 人<br><input type="checkbox"/> 16-20 人 <input type="checkbox"/> 21-25 人 <input type="checkbox"/> > 25 人 |
|      | 个人防护            | <input type="checkbox"/> 全程佩戴口罩 <input type="checkbox"/> 全程未佩戴<br><input type="checkbox"/> 部分时段佩戴       | 备注            |                                                                                                                                                                                                                   |
| 活动   | 场地位置            | <input type="checkbox"/> 教室 <input type="checkbox"/> 走廊 <input type="checkbox"/> 操场<br>补充: _____        | 场地情况          | <input type="checkbox"/> 固定授课 <input type="checkbox"/> 室内活动 <input type="checkbox"/> 室外活动 <input type="checkbox"/> 室内就餐<br>补充: _____                                                                              |
|      | 开始至结束时间         | _____至_____                                                                                             | 场地人数          | 人数: _____<br><input type="checkbox"/> 1-5 人 <input type="checkbox"/> 6-10 人 <input type="checkbox"/> 11-15 人<br><input type="checkbox"/> 16-20 人 <input type="checkbox"/> 21-25 人 <input type="checkbox"/> > 25 人 |
|      | 个人防护            | <input type="checkbox"/> 全程佩戴口罩 <input type="checkbox"/> 全程未佩戴<br><input type="checkbox"/> 部分时段佩戴       | 备注            |                                                                                                                                                                                                                   |
| 活动   | 场地位置            | <input type="checkbox"/> 教室 <input type="checkbox"/> 走廊 <input type="checkbox"/> 操场<br>补充: _____        | 场地情况          | <input type="checkbox"/> 固定授课 <input type="checkbox"/> 室内活动 <input type="checkbox"/> 室外活动 <input type="checkbox"/> 室内就餐<br>补充: _____                                                                              |
|      | 开始至结束时间         | _____至_____                                                                                             | 场地人数          | 人数: _____<br><input type="checkbox"/> 1-5 人 <input type="checkbox"/> 6-10 人 <input type="checkbox"/> 11-15 人<br><input type="checkbox"/> 16-20 人 <input type="checkbox"/> 21-25 人 <input type="checkbox"/> > 25 人 |
|      | 个人防护            | <input type="checkbox"/> 全程佩戴口罩 <input type="checkbox"/> 全程未佩戴<br><input type="checkbox"/> 部分时段佩戴       | 备注            |                                                                                                                                                                                                                   |
| 活动   | 场地位置            | <input type="checkbox"/> 教室 <input type="checkbox"/> 走廊 <input type="checkbox"/> 操场<br>补充: _____        | 场地情况          | <input type="checkbox"/> 固定授课 <input type="checkbox"/> 室内活动 <input type="checkbox"/> 室外活动 <input type="checkbox"/> 室内就餐<br>补充: _____                                                                              |
|      | 开始至结束时间         | _____至_____                                                                                             | 场地人数          | 人数: _____<br><input type="checkbox"/> 1-5 人 <input type="checkbox"/> 6-10 人 <input type="checkbox"/> 11-15 人<br><input type="checkbox"/> 16-20 人 <input type="checkbox"/> 21-25 人 <input type="checkbox"/> > 25 人 |
|      | 个人防护            | <input type="checkbox"/> 全程佩戴口罩 <input type="checkbox"/> 全程未佩戴<br><input type="checkbox"/> 部分时段佩戴       | 备注            |                                                                                                                                                                                                                   |
| 活动   | 场地位置            | <input type="checkbox"/> 教室 <input type="checkbox"/> 走廊 <input type="checkbox"/> 操场<br>补充: _____        | 场地情况          | <input type="checkbox"/> 固定授课 <input type="checkbox"/> 室内活动 <input type="checkbox"/> 室外活动 <input type="checkbox"/> 室内就餐<br>补充: _____                                                                              |
|      | 开始至结束时间         | _____至_____                                                                                             | 场地人数          | 人数: _____<br><input type="checkbox"/> 1-5 人 <input type="checkbox"/> 6-10 人 <input type="checkbox"/> 11-15 人<br><input type="checkbox"/> 16-20 人 <input type="checkbox"/> 21-25 人 <input type="checkbox"/> > 25 人 |
|      | 个人防护            | <input type="checkbox"/> 全程佩戴口罩 <input type="checkbox"/> 全程未佩戴<br><input type="checkbox"/> 部分时段佩戴       | 备注            |                                                                                                                                                                                                                   |

B.幼儿园接触模式调查表（接触）

|      |      |                                                                                                                                |        |        |        |        |        |        |
|------|------|--------------------------------------------------------------------------------------------------------------------------------|--------|--------|--------|--------|--------|--------|
| 基本情况 | 问卷编号 |                                                                                                                                |        |        | 观察员    |        |        |        |
|      | 观察日期 |                                                                                                                                |        |        | 观察对象   |        |        |        |
| 活动   | 接触对象 | 对象身份                                                                                                                           | A 主动间接 | a 被动间接 | B 主动肢体 | b 被动肢体 | C 主动皮肤 | c 被动皮肤 |
| 活动 1 |      | <input type="checkbox"/> 本班学生<br><input type="checkbox"/> 外班学生<br><input type="checkbox"/> 老师<br><input type="checkbox"/> 其他人员 |        |        |        |        |        |        |
| 活动   |      | <input type="checkbox"/> 本班学生<br><input type="checkbox"/> 外班学生<br><input type="checkbox"/> 老师<br><input type="checkbox"/> 其他人员 |        |        |        |        |        |        |
| 活动   |      | <input type="checkbox"/> 本班学生<br><input type="checkbox"/> 外班学生<br><input type="checkbox"/> 老师<br><input type="checkbox"/> 其他人员 |        |        |        |        |        |        |
| 活动   |      | <input type="checkbox"/> 本班学生<br><input type="checkbox"/> 外班学生<br><input type="checkbox"/> 老师<br><input type="checkbox"/> 其他人员 |        |        |        |        |        |        |
| 活动   |      | <input type="checkbox"/> 本班学生<br><input type="checkbox"/> 外班学生<br><input type="checkbox"/> 老师<br><input type="checkbox"/> 其他人员 |        |        |        |        |        |        |
| 活动   |      | <input type="checkbox"/> 本班学生<br><input type="checkbox"/> 外班学生<br><input type="checkbox"/> 老师<br><input type="checkbox"/> 其他人员 |        |        |        |        |        |        |
| 活动   |      | <input type="checkbox"/> 本班学生<br><input type="checkbox"/> 外班学生<br><input type="checkbox"/> 老师<br><input type="checkbox"/> 其他人员 |        |        |        |        |        |        |
| 活动   |      | <input type="checkbox"/> 本班学生<br><input type="checkbox"/> 外班学生<br><input type="checkbox"/> 老师<br><input type="checkbox"/> 其他人员 |        |        |        |        |        |        |
| 活动   |      | <input type="checkbox"/> 本班学生<br><input type="checkbox"/> 外班学生<br><input type="checkbox"/> 老师<br><input type="checkbox"/> 其他人员 |        |        |        |        |        |        |
| 活动   |      | <input type="checkbox"/> 本班学生<br><input type="checkbox"/> 外班学生<br><input type="checkbox"/> 老师<br><input type="checkbox"/> 其他人员 |        |        |        |        |        |        |

## Text S2. Contact recording form (translated version, in English)

*Note that the following translation of the contact recording form is intended only for international readers to understand the context (i.e., it was not used for contact recording).*

### A. Contact patterns recording form (activities)

|                                                                                                                                                                                                                                 |                                                                                                                                                                        |                                                                                                                                                                                                         |                                                                                                                                                                                                                                                   |                                                                                                                                     |
|---------------------------------------------------------------------------------------------------------------------------------------------------------------------------------------------------------------------------------|------------------------------------------------------------------------------------------------------------------------------------------------------------------------|---------------------------------------------------------------------------------------------------------------------------------------------------------------------------------------------------------|---------------------------------------------------------------------------------------------------------------------------------------------------------------------------------------------------------------------------------------------------|-------------------------------------------------------------------------------------------------------------------------------------|
| Form ID: _____                                                                                                                                                                                                                  |                                                                                                                                                                        | Observer: _____                                                                                                                                                                                         |                                                                                                                                                                                                                                                   |                                                                                                                                     |
| Date of observation: _____                                                                                                                                                                                                      |                                                                                                                                                                        | Class: _____                                                                                                                                                                                            |                                                                                                                                                                                                                                                   |                                                                                                                                     |
| Subject name and ID: _____                                                                                                                                                                                                      |                                                                                                                                                                        | Date of birth: _____                                                                                                                                                                                    |                                                                                                                                                                                                                                                   |                                                                                                                                     |
| Sex: _____                                                                                                                                                                                                                      |                                                                                                                                                                        | Classroom: _____                                                                                                                                                                                        |                                                                                                                                                                                                                                                   |                                                                                                                                     |
| Number of attendees: _____                                                                                                                                                                                                      |                                                                                                                                                                        | Teacher(s): _____                                                                                                                                                                                       |                                                                                                                                                                                                                                                   |                                                                                                                                     |
| Any respiratory symptoms observed from the subject during the observation.<br><input type="checkbox"/> Runny nose <input type="checkbox"/> Cough <input type="checkbox"/> Sneeze <input type="checkbox"/> Other symptoms: _____ |                                                                                                                                                                        |                                                                                                                                                                                                         |                                                                                                                                                                                                                                                   |                                                                                                                                     |
| Time: _____<br><br>Activity ID: <u>1.</u><br><br>Activity: _____<br>(Free text)                                                                                                                                                 | Location:<br><input type="checkbox"/> Classroom<br><input type="checkbox"/> Corridor<br><input type="checkbox"/> Playfield<br><input type="checkbox"/> Others<br>_____ | Type of the activity:<br><input type="checkbox"/> Indoor<br><input type="checkbox"/> Outdoor<br><input type="checkbox"/> Learning<br><input type="checkbox"/> Dining<br><input type="checkbox"/> Others | Total number of people in this location :<br><input type="checkbox"/> 1-5<br><input type="checkbox"/> 6-10<br><input type="checkbox"/> 11-15<br><input type="checkbox"/> 16-20<br><input type="checkbox"/> 21-25<br><input type="checkbox"/> > 25 | Wearing a mask or not :<br><input type="checkbox"/> Yes<br><input type="checkbox"/> No<br><input type="checkbox"/> Part of the time |
| Time: _____<br><br>Activity ID: <u>2.</u><br><br>Activity: _____<br>(Free text)                                                                                                                                                 | Location:<br><input type="checkbox"/> Classroom<br><input type="checkbox"/> Corridor<br><input type="checkbox"/> Playfield<br><input type="checkbox"/> Others<br>_____ | Type of the activity:<br><input type="checkbox"/> Indoor<br><input type="checkbox"/> Outdoor<br><input type="checkbox"/> Learning<br><input type="checkbox"/> Dining<br><input type="checkbox"/> Others | Total number of people in this location :<br><input type="checkbox"/> 1-5<br><input type="checkbox"/> 6-10<br><input type="checkbox"/> 11-15<br><input type="checkbox"/> 16-20<br><input type="checkbox"/> 21-25<br><input type="checkbox"/> > 25 | Wearing a mask or not :<br><input type="checkbox"/> Yes<br><input type="checkbox"/> No<br><input type="checkbox"/> Part of the time |
| Time: _____<br><br>Activity ID: <u>3.</u><br><br>Activity: _____<br>(Free text)                                                                                                                                                 | Location:<br><input type="checkbox"/> Classroom<br><input type="checkbox"/> Corridor<br><input type="checkbox"/> Playfield<br><input type="checkbox"/> Others<br>_____ | Type of the activity:<br><input type="checkbox"/> Indoor<br><input type="checkbox"/> Outdoor<br><input type="checkbox"/> Learning<br><input type="checkbox"/> Dining<br><input type="checkbox"/> Others | Total number of people in this location :<br><input type="checkbox"/> 1-5<br><input type="checkbox"/> 6-10<br><input type="checkbox"/> 11-15<br><input type="checkbox"/> 16-20<br><input type="checkbox"/> 21-25<br><input type="checkbox"/> > 25 | Wearing a mask or not :<br><input type="checkbox"/> Yes<br><input type="checkbox"/> No<br><input type="checkbox"/> Part of the time |
| ...                                                                                                                                                                                                                             | ...                                                                                                                                                                    | ...                                                                                                                                                                                                     | ...                                                                                                                                                                                                                                               | ...                                                                                                                                 |

B. Contact patterns recording form (contacts)

|                     |                   |                                                                                                                                                    |                                       |                    |                     |                      |                 |                |
|---------------------|-------------------|----------------------------------------------------------------------------------------------------------------------------------------------------|---------------------------------------|--------------------|---------------------|----------------------|-----------------|----------------|
| Form ID             |                   |                                                                                                                                                    |                                       | Observer           |                     |                      |                 |                |
| Date of observation |                   |                                                                                                                                                    |                                       | Subject            |                     |                      |                 |                |
| Activity            | Person in contact |                                                                                                                                                    | Mode of contacts (mutually exclusive) |                    |                     |                      |                 |                |
|                     | ID/name           | Category                                                                                                                                           | (A) Verbal active                     | (a) Verbal passive | (B) Non-skin active | (b) Non-skin passive | (C) Skin active | © Skin passive |
| Activity 1          |                   | <input type="checkbox"/> Same class<br><input type="checkbox"/> Other class<br><input type="checkbox"/> Teacher<br><input type="checkbox"/> Others |                                       |                    |                     |                      |                 |                |
| Activity 2          |                   | <input type="checkbox"/> Same class<br><input type="checkbox"/> Other class<br><input type="checkbox"/> Teacher<br><input type="checkbox"/> Others |                                       |                    |                     |                      |                 |                |
| Activity 3          |                   | <input type="checkbox"/> Same class<br><input type="checkbox"/> Other class<br><input type="checkbox"/> Teacher<br><input type="checkbox"/> Others |                                       |                    |                     |                      |                 |                |
| ...                 |                   | ...                                                                                                                                                |                                       |                    |                     |                      |                 |                |

Table S1. List of touch surfaces for environmental sample collection.

| Setting                          | Description                                                                                                                           | Photo                                                                                |
|----------------------------------|---------------------------------------------------------------------------------------------------------------------------------------|--------------------------------------------------------------------------------------|
| The classroom of the lower grade | Toy storage box surface <ul style="list-style-type: none"><li>Pooled sample of the edges of the toy storage box.</li></ul>            |    |
| The classroom of the lower grade | Student desk surface <ul style="list-style-type: none"><li>Covering the 10cm*10cm area of the desk.</li></ul>                         |   |
| The classroom of the lower grade | The door knob to the nap room <ul style="list-style-type: none"><li>The front and rear handles of the door (pooled sample).</li></ul> |  |
| The classroom of the lower grade | Water dispenser switches <ul style="list-style-type: none"><li>The two switches (pooled sample).</li></ul>                            |  |

| Setting                          | Description                                                                                                                                                                                                                      | Photo                                                                                |
|----------------------------------|----------------------------------------------------------------------------------------------------------------------------------------------------------------------------------------------------------------------------------|--------------------------------------------------------------------------------------|
| The classroom of the lower grade | Washroom faucets <ul style="list-style-type: none"> <li>Two water faucets (pooled sample).</li> </ul>                                                                                                                            |    |
| The classroom of the lower grade | Books for reading <ul style="list-style-type: none"> <li>The front and back of the book (pooled sample).</li> </ul>                                                                                                              |   |
| The classroom of the lower grade | The door knob to the entrance of the classroom <ul style="list-style-type: none"> <li>The front and rear handles of the door (mixed sample).</li> <li>Expected to be less frequently touched by students (as control)</li> </ul> |  |
| The classroom of the lower grade | The classroom light switch <ul style="list-style-type: none"> <li>Expected to be less frequently touched by students (as control)</li> </ul>                                                                                     |  |

| Setting                           | Description                                                                                                   | Photo                                                                                |
|-----------------------------------|---------------------------------------------------------------------------------------------------------------|--------------------------------------------------------------------------------------|
| The classroom of the middle grade | Books for reading <ul style="list-style-type: none"><li>Mixing the front and back of the book.</li></ul>      | 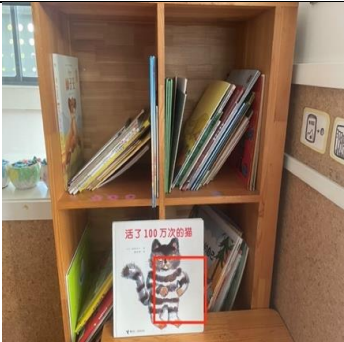   |
| The classroom of the middle grade | The classroom light switch                                                                                    |   |
| The classroom of the middle grade | Washroom faucets <ul style="list-style-type: none"><li>Two water faucets (pooled sample).</li></ul>           |  |
| The classroom of the middle grade | Student desk surface <ul style="list-style-type: none"><li>Covering the 10cm*10cm area of the desk.</li></ul> |  |



| Setting                           | Description                                                                                                                                                                                                                              | Photo                                                                                |
|-----------------------------------|------------------------------------------------------------------------------------------------------------------------------------------------------------------------------------------------------------------------------------------|--------------------------------------------------------------------------------------|
| The classroom of the middle grade | <div>Toy storage box surface</div> <ul style="list-style-type: none"><li>Pooled sample of the edges of the toy storage box.</li></ul>                                                                                                    |    |
| The classroom of the middle grade | <div>Pens (for drawing)</div>                                                                                                                                                                                                            |   |
| The classroom of the middle grade | <div>The door knob to the entrance of the classroom</div> <ul style="list-style-type: none"><li>The front and rear handles of the door (mixed sample).</li><li>Expected to be less frequently touched by students (as control)</li></ul> |  |
| The classroom of the middle grade | <div>Water dispenser switches</div> <ul style="list-style-type: none"><li>The two switches (pooled sample).</li></ul>                                                                                                                    |  |

| Setting                          | Description                                                                                                                                  | Photo                                                                                |
|----------------------------------|----------------------------------------------------------------------------------------------------------------------------------------------|--------------------------------------------------------------------------------------|
| The classroom of the upper grade | The classroom light switch <ul style="list-style-type: none"> <li>Expected to be less frequently touched by students (as control)</li> </ul> |    |
| The classroom of the upper grade | Toy storage box surface <ul style="list-style-type: none"> <li>Pooled sample of the edges of the toy storage box.</li> </ul>                 |   |
| The classroom of the upper grade | Books for reading <ul style="list-style-type: none"> <li>Mixing the front and back of the book.</li> </ul>                                   |  |
| The classroom of the upper grade | Washroom faucets <ul style="list-style-type: none"> <li>Two water faucets (pooled sample).</li> </ul>                                        |  |

| Setting                          | Description                                                                                                                                     | Photo                                                                                |
|----------------------------------|-------------------------------------------------------------------------------------------------------------------------------------------------|--------------------------------------------------------------------------------------|
| The classroom of the upper grade | Student desk surface <ul style="list-style-type: none"> <li>Covering the 10cm*10cm area of the desk.</li> </ul>                                 | 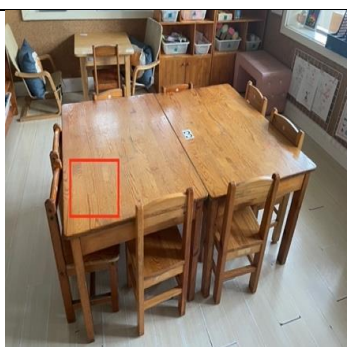   |
| The classroom of the upper grade | Pens (for drawing)                                                                                                                              |   |
| The classroom of the upper grade | Water dispenser switches <ul style="list-style-type: none"> <li>The two switches (pooled sample).</li> </ul>                                    |  |
| The classroom of the upper grade | The door knob to the entrance of the classroom <ul style="list-style-type: none"> <li>Mixing the front and rear handles of the door.</li> </ul> |  |

| Setting             | Description                                                                                                                                                      | Photo                                                                                |
|---------------------|------------------------------------------------------------------------------------------------------------------------------------------------------------------|--------------------------------------------------------------------------------------|
| Communal areas      | Staircase handrails <ul style="list-style-type: none"> <li>Between the first and second floors.</li> <li>Covering the 10cm*10cm area of the handrail.</li> </ul> |    |
| Communal areas      | Bicycle handrails <ul style="list-style-type: none"> <li>Pooled sample of two handrails of the bicycle.</li> </ul>                                               |   |
| Communal playground | Children's slide handrail (plastic) <ul style="list-style-type: none"> <li>Covering the 10cm*10cm area of the handrail.</li> </ul>                               |  |
| Communal playground | Children's slide handrail (wood) <ul style="list-style-type: none"> <li>Covering the 10cm*10cm area of the handrail.</li> </ul>                                  |  |
